# Supplementary material
Source: PubMed Central journal article supplement (PMC5218510)
Supplement: NIHMS804907-supplement-Supplemental_Material.pdf [file NIHMS804907-supplement-Supplemental_Material.pdf]

## SUPPLEMENTAL MATERIAL

**Supplemental Table 1.** Baseline characteristics at Visit 5 stratified by sex

|                                 | Female       | Male         |
|---------------------------------|--------------|--------------|
|                                 | N=2687       | N=1656       |
| <b>Clinical Characteristics</b> |              |              |
| Age (years)                     | 75±5         | 76±5         |
| Black                           | 622 (23.1%)  | 302 (18.2%)  |
| Center                          |              |              |
| Forsyth County                  | 580 (21.6%)  | 398 (24.0%)  |
| Jackson                         | 574 (21.4%)  | 265 (16.0%)  |
| Minneapolis                     | 806 (30.0%)  | 555 (33.5%)  |
| Washington County               | 727 (27.1%)  | 438 (26.4%)  |
| Diabetes mellitus               | 866 (32.2%)  | 599 (36.2%)  |
| Hypertension                    | 2179 (81.1%) | 1295 (78.2%) |
| Current Smoker                  | 143 (5.4%)   | 101 (6.2%)   |
| Heart rate (bpm)                | 63± 10       | 61±11        |
| SBP (mmHg)                      | 131±18       | 129± 16      |
| DBP (mmHg)                      | 67±10        | 68±10        |
| <b>Body Composition</b>         |              |              |
| Height (cm)                     | 160±6        | 174±7        |
| Weight (kg)                     | 73±16        | 87±15        |
| BMI (kg/m <sup>2</sup> )        | 28.7±5.9     | 28.5±46      |

|                          |           |            |
|--------------------------|-----------|------------|
| Fat mass (g)             | 39.3±7.0  | 28.8±12.0  |
| Waist circumference (cm) | 98.5±14.2 | 104.3±11.7 |
| Waist hip ratio          | 0.90±0.08 | 0.98±0.05  |

**Laboratory Values**

|                                   |                   |                   |
|-----------------------------------|-------------------|-------------------|
| HbA1c (%)                         | 5.9±0.8           | 5.9±0.8           |
| Total Chol (mg/dL)                | 195±40            | 173±38            |
| LDL (mg/dL)                       | 113±33            | 102±33            |
| HDL (mg/dL)                       | 57±14             | 47±11             |
| Triglycerides (mg/dL)             | 126±60            | 125±67            |
| hs-CRP (mg/L)                     | 2.17 [1.04, 4.47] | 1.73 [0.83, 3.41] |
| hs-TnT (ng/L)                     | 0.01 [0.01, 0.01] | 0.01 [0.01, 0.01] |
| NT-proBNP (pg/mL)                 | 130 [68, 230]     | 92 [50, 179]      |
| eGFR (ml/min/1.73m <sup>2</sup> ) | 71.09±16.30       | 71.03±16.11       |

---

Data are shown as means±SD, median [IQR], or N (%)
